# Supplementary material for: Association between early ondansetron administration and outcomes in critically ill patients
Source: Research Square preprint supplement (doi:10.21203/rs.3.rs-1305228/v1), 2022-02-01
Supplement: Supplementary file 1 [file eb9f50e32a45f1c55c82500c.docx]

Table A1 Percentage of missing data in the variables in the interest.

| Variables | MIMIC-IV  (n = 51342) |
| --- | --- |
| Baseline characteristics | |
| Age, years | 0% |
| Men, gender | 0% |
| Ethnicity | 10.5% |
| Admission type | 0% |
| ICU types | 0% |
| Comorbidities at ICU admission |  |
| Myocardial infarct | 0% |
| Congestive heart failure | 0% |
| Peripheral vascular disease | 0% |
| Cerebrovascular disease | 0% |
| Dementia | 0% |
| Chronic pulmonary disease | 0% |
| Rheumatic disease | 0% |
| Peptic ulcer disease | 0% |
| Liver disease | 0% |
| Diabetes | 0% |
| Paraplegia | 0% |
| Renal disease | 0% |
| Malignant cancer | 0% |
| Metastatic solid tumor | 0% |
| AIDS | 0% |
| Need of support in the first 24 hours |  |
| Vasopressors | 0% |
| MV | 0% |
| RRT | 0% |
| Primary diagnosis | 0.4% |
| Severity of illness |  |
| SOFA score | 0% |
| SAPS II score | 0% |
| Outcome |  |
| In-hospital death | 0% |
| Ondansetron use | 0% |
| Ondansetron dose | 0% |

Abbreviations: ICU: intensive care unit; AIDS: acute respiratory distress syndrome; MV: mechanical ventilation; RRT: renal replacement therapy; SOFA: sequential organ failure assessment; SAPS II: Simplified Acute Physiology Score II.
